# Supplementary material for: Qualitative and quantitative determinations of pyridalyl and metabolites in excrement of two representative Lepidoptera pests
Source: Royal Society of Chemistry journal article supplement (doi:10.1039/c5ra21984a), 2015-01-01
Supplement: c5ra21984a1.pdf [file c5ra21984a1.pdf]

## Supporting information

---

### **Qualitative and quantitative determinations for pyridalyl and metabolites in excrement of two representative Lepidoptera pests**

**Lingling Wang, Yuting Nie, Yujiao Wang, Zhenyu Wang\*, Bo Xiong\***

Key Laboratory of Pesticides & Chemical Biology, Ministry of Education, College of Chemistry,  
Central China Normal University, 152 Luoyu Road, Wuhan 430079, China

\*Corresponding author: E-mail: bx@mail.ccnu.edu.cn. Tel.: +86 (0)2767867961; Fax: +86  
(0)2767867962 (Bo Xiong).

Additional Corresponding author: E-mail: zywang@mail.ccnu.edu.cn; Tel.: +86 (0)27 67867983;  
Fax: +86 (0)27 67867984 (Zhenyu Wang).

### Contents

1. **Fig. S1.**  $^1\text{H}$  NMR spectrum of pyridalyl.
2. **Fig. S2.** Culture of pests and metabolic experiments.
3. **Fig. S3.** The calibration curve of pyridalyl.
4. **Fig. S4.** Comparison of four SPE columns.
5. **Fig. S5.** EIC for pyridalyl and metabolites in the excrement of *S. exigua*.

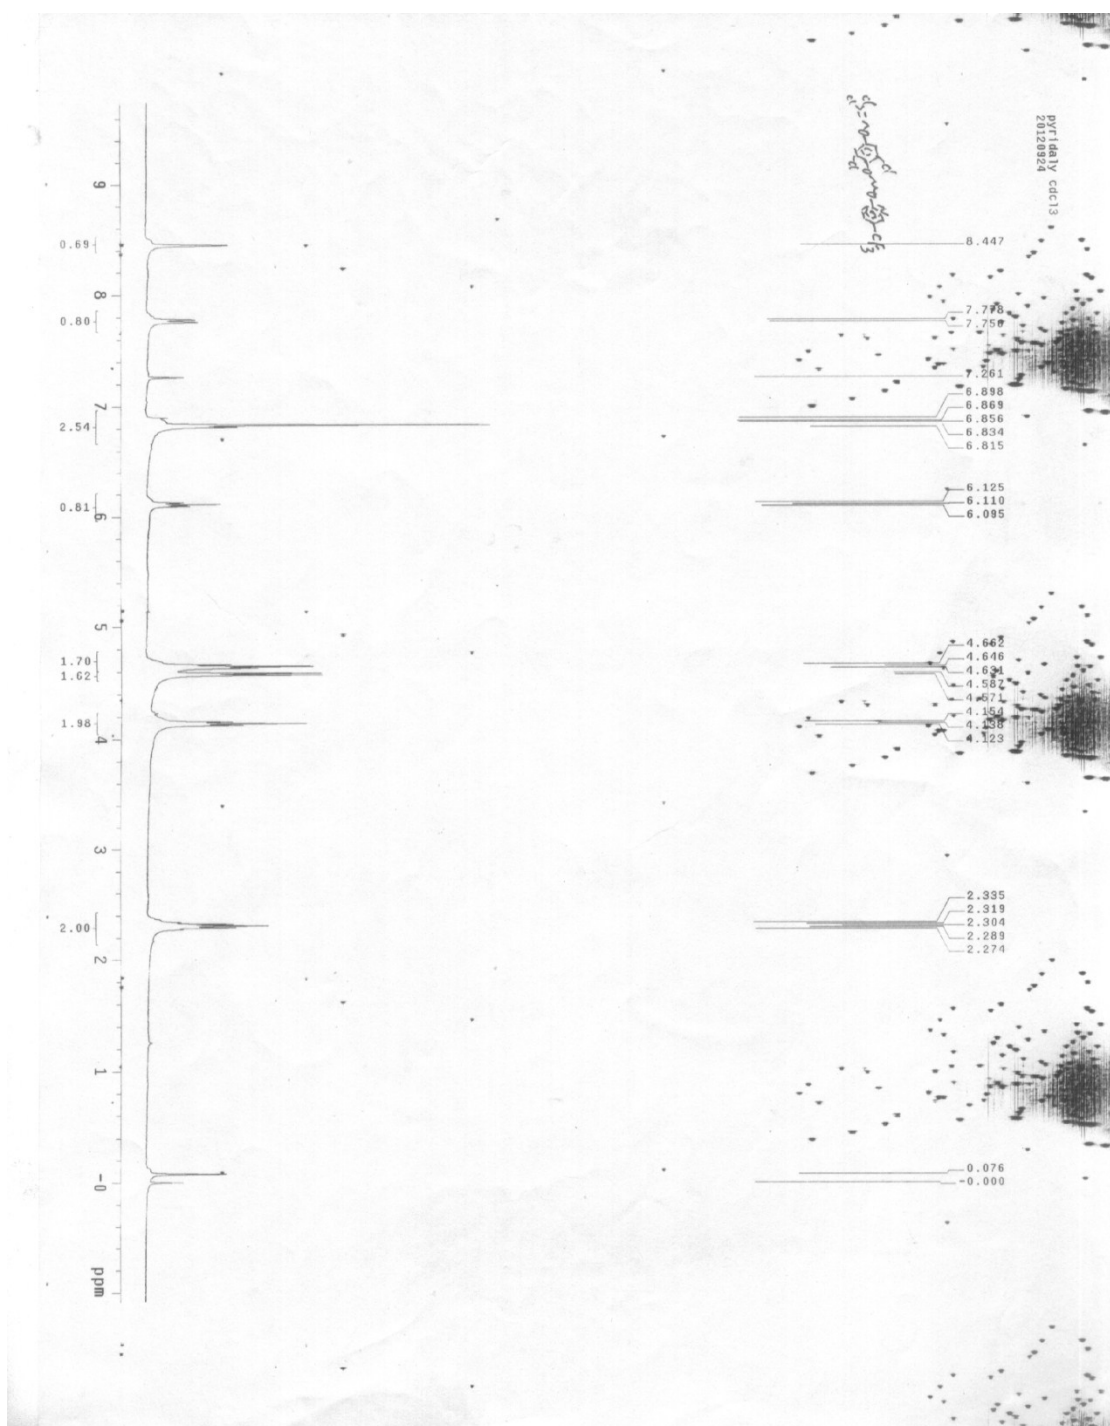

**Fig. S1.**  $^1\text{H}$  NMR spectrum of pyridalyl.

## Supporting information

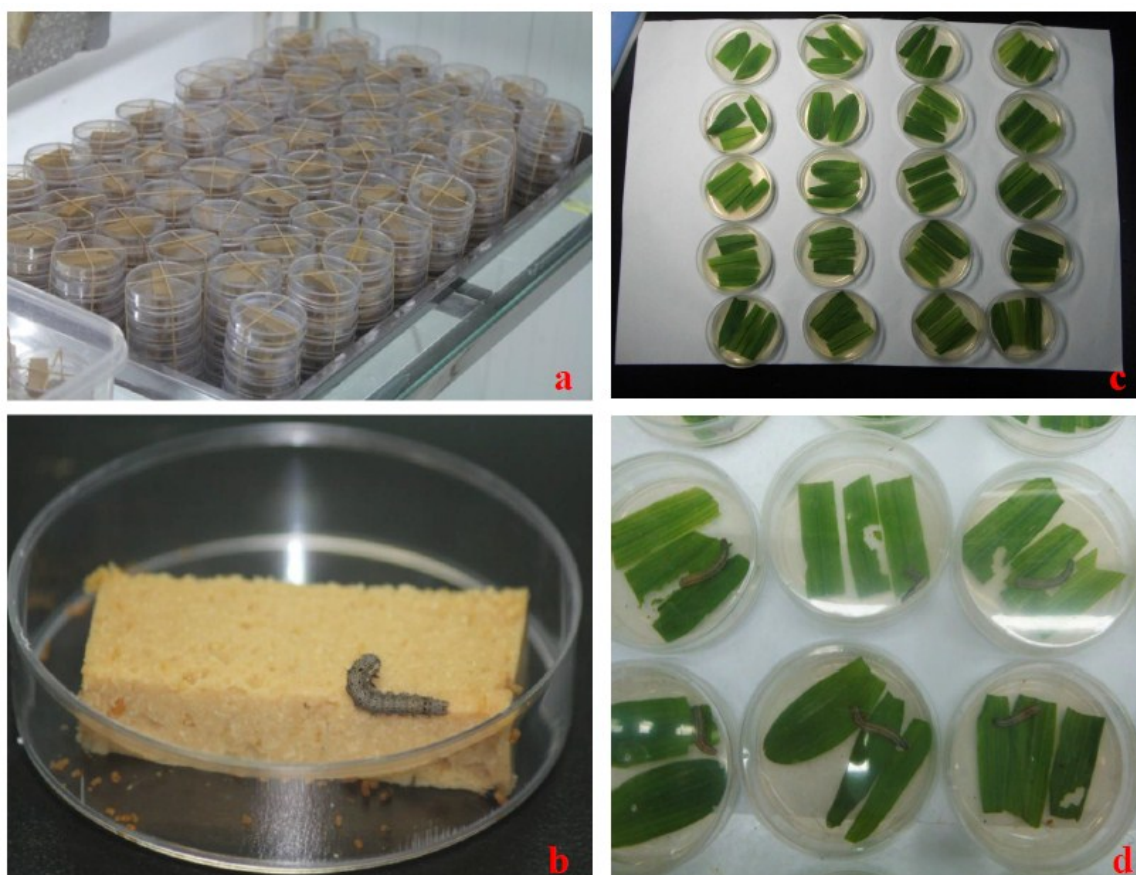

**Fig. S2.** Culture of pests and metabolic experiments. (a: the environment to culture *H. armigera* and *S. exigua*; b: the 3<sup>rd</sup> instar larva of *H. armigera*; c: petri dishes with treated leaves and control leaves; d: the metabolic experiment of *S. exigua*.)

## Supporting information

---

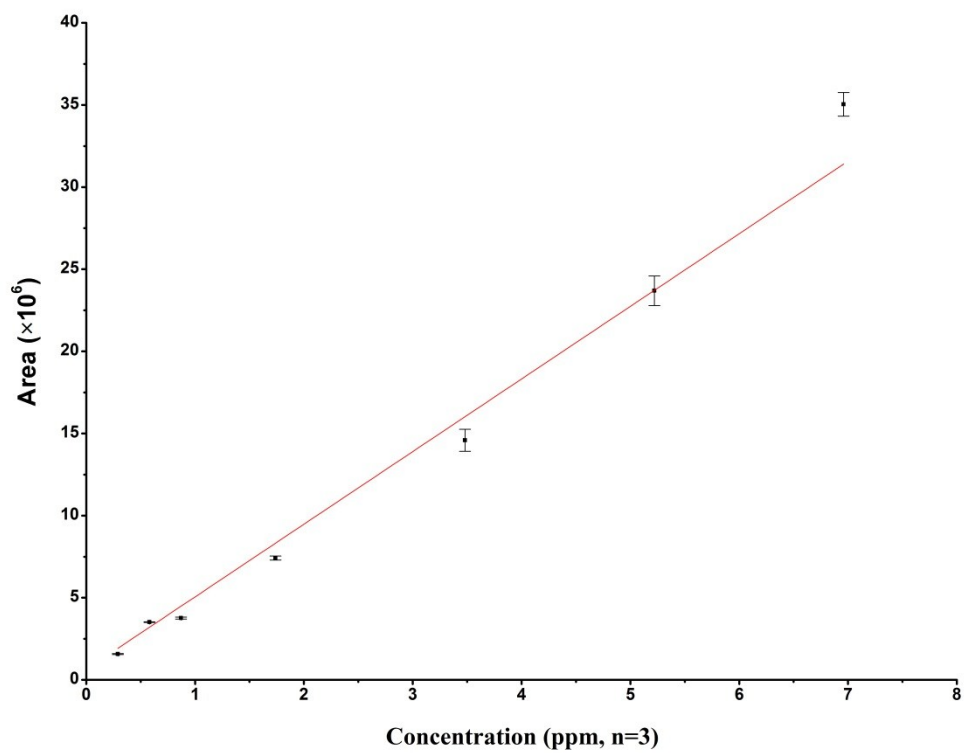

**Fig. S3.** The calibration curve of pyridalyl.

## Supporting information

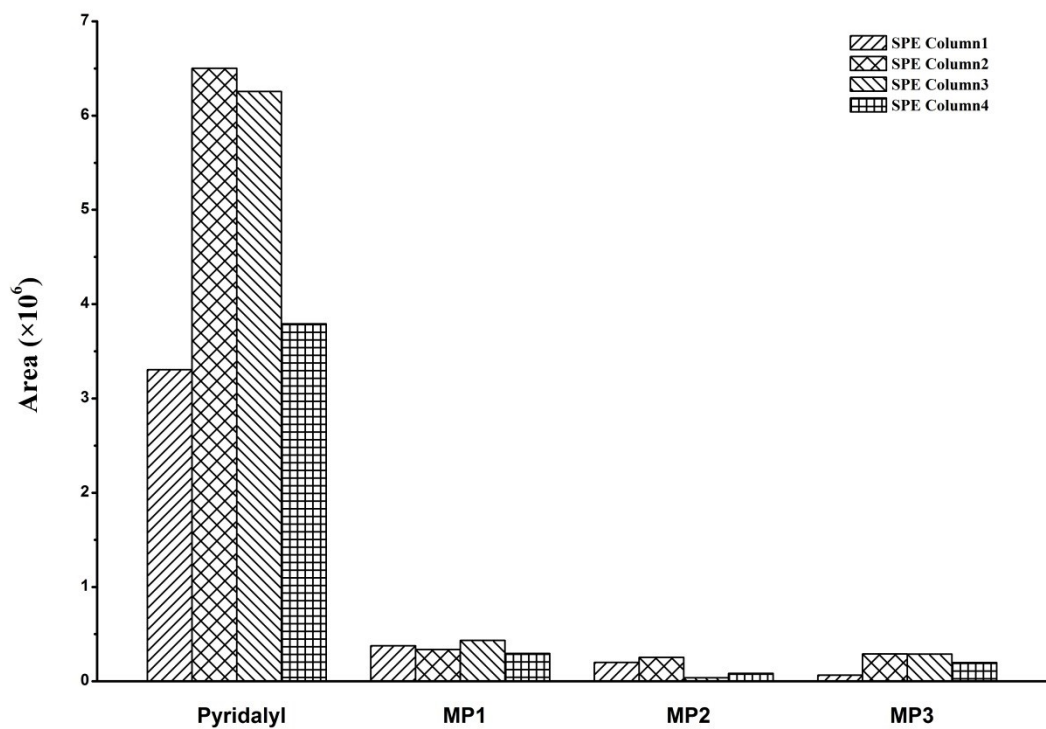

**Fig. S4.** Comparison of four SPE columns.

## Supporting information

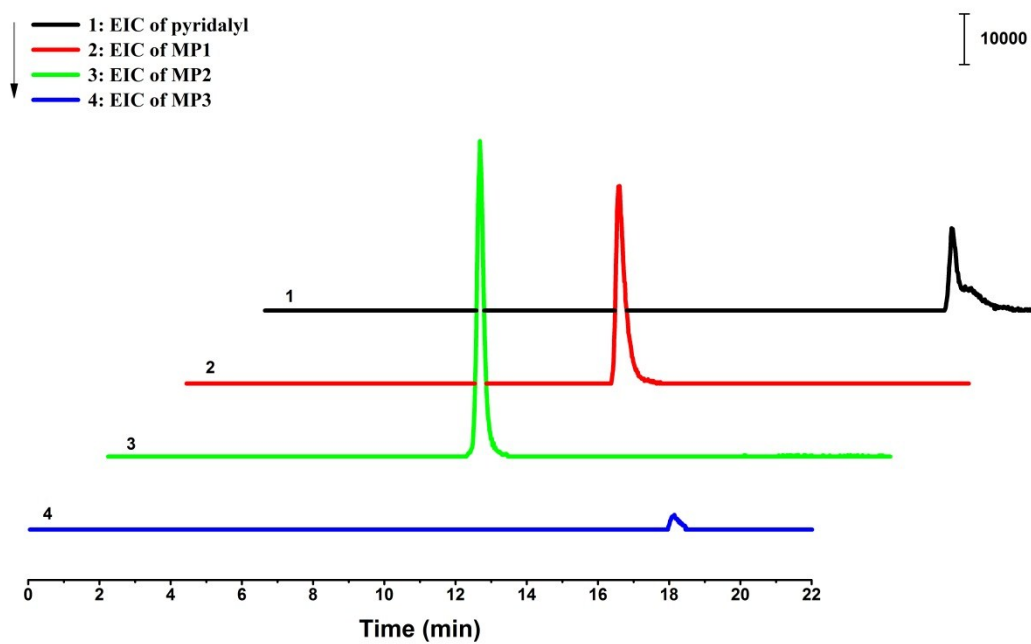

**Fig. S5.** EIC of pyridalyl and its metabolites in the excrement of *S. exigua*.
